# Supplementary material for: Deleterious Variants in WNT10A, EDAR, and EDA Causing Isolated and Syndromic Tooth Agenesis: A Structural Perspective from Molecular Dynamics Simulations
Source: PubMed Central journal article supplement (PMC6862269; doi:10.3390/ijms20215282), 2019-10-24
Supplement: ijms-20-05282-s001.pdf [file ijms-20-05282-s001.pdf]

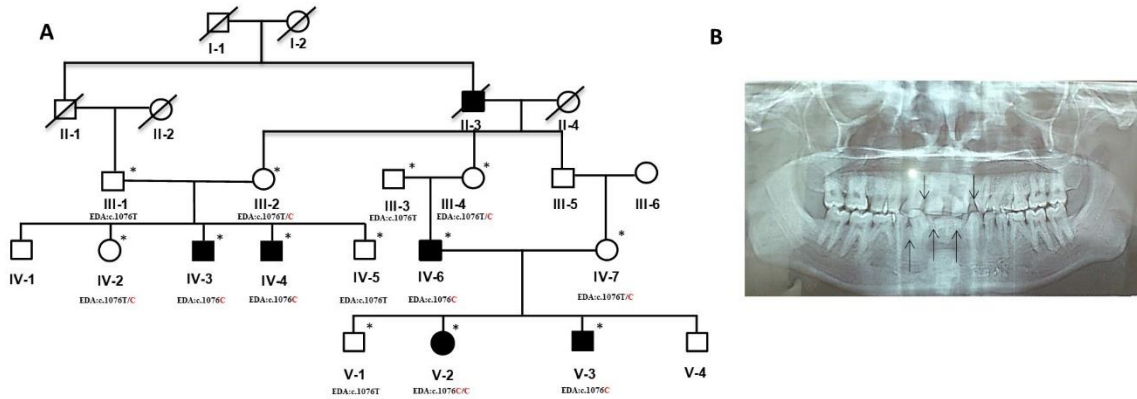

**Figure S1:** Pedigree of Family D showing X-linked mode of inheritance. **(A)** Asterisks (\*) are representing the DNA samples available for study. **(B)** Orthopantomogram (OPG) analysis of the affected member (IV-4) is showing the absence of lateral incisors in the maxilla and mandibular, central incisors of mandibular, second premolars (teeth # 12, 22, 32, 42, 31, 41, 35, 45 respectively). The presence of some retained deciduous teeth is also visible (teeth # 65, 71, 73, 75, 81, 85). The segregation of disease-allele (red) and wild-type allele (black) is shown below the each participant.

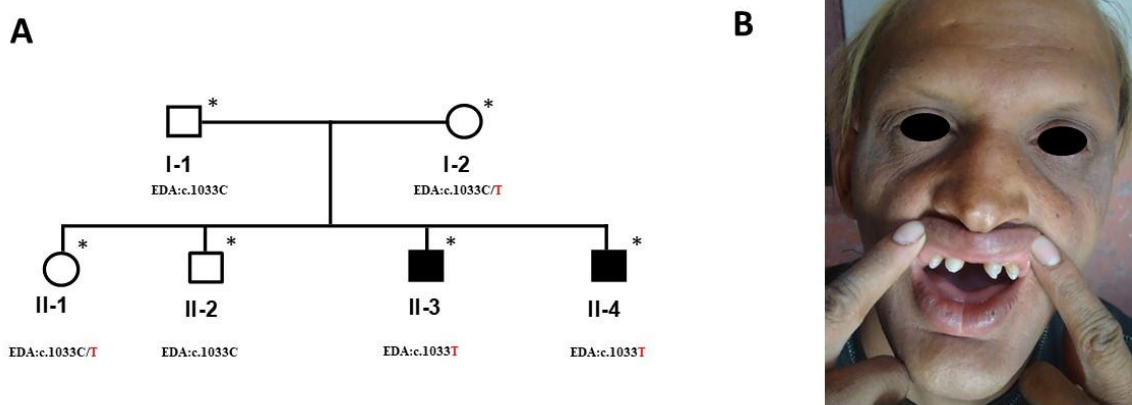

**Figure S2:** Pedigree diagram of Family E showing X-linked HED. **(A)** Asterisks (\*) are representing the DNA samples of available affected and unaffected members. **(B)** Patients (II-3) is showing typical canonical teeth, saddle-shaped nose, and pigmentation around the eyes. The segregation of disease-allele (red) and wild-type allele (black) is shown below the each participant.

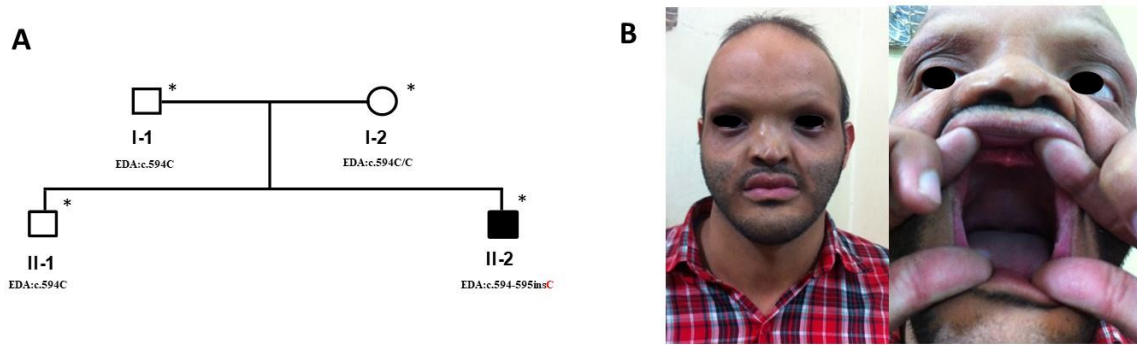

**Figure S3:** Pedigree of X-linked HED family F. (A) Available samples are labeled with asterisks (\*). (B) Affected member (II-2) is showing sparse eye-brows and eye-lashes, prominent lips, and absent frontal teeth. The segregation of disease-allele (red) and wild-type allele (black) is shown below the each participant.

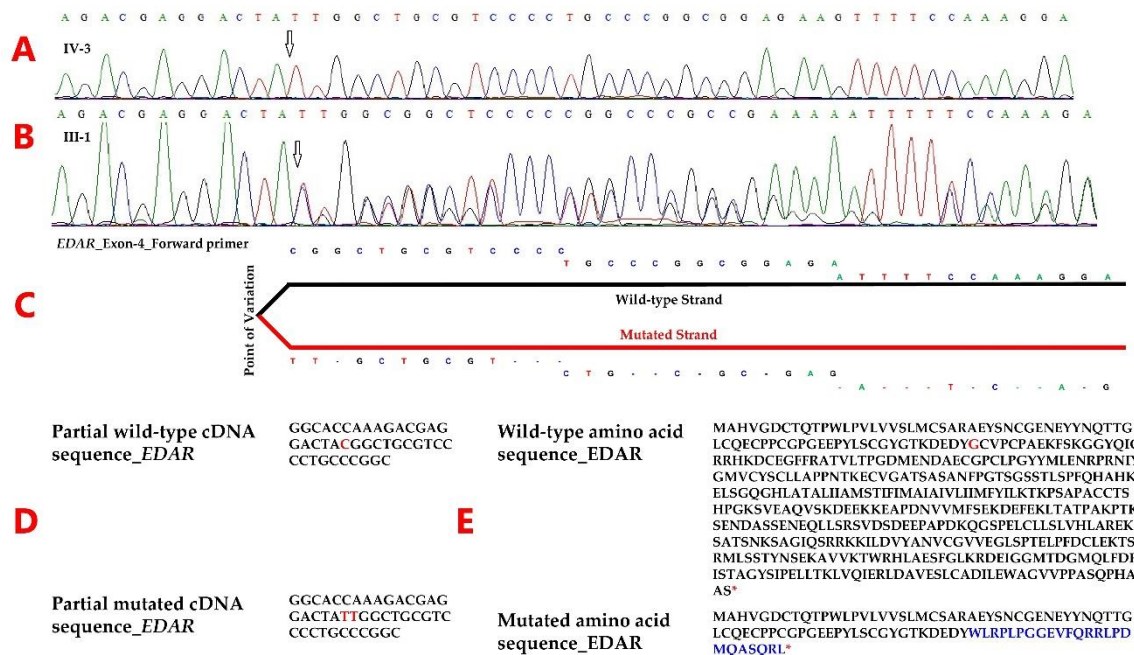

**Figure S4:** Panel A: B are showing the nucleotide sequences of an affected (IV-3) and a carrier individual (III-1) of family B in the result of a frameshift variant c.207delinsTT, p.Gly70Trpfs\*25 in EDAR (a similar sequence can be found in Figure 4B in the main text). Panel C is showing wild-type and mutant DNA strands after the point of complex genetic alteration (homozygous deletion of C nucleotide and homozygous insertion of TT nucleotides at the same point). Panel D and E are the cDNA and protein sequences of EDAR, obtained from MutationTaster. Panel D is showing wild-type cDNA sequence and mutated cDNA sequence, red C is the deleted nucleotide, and red TT are the two inserted bases. Panel E is presenting the wild-type and mutated amino acid residues. Red G (Gly) is the point of alteration, and the blue amino acid sequence shows the protein composition after the variation leading to a premature termination codon, thus forming a truncated protein (Predictions from MutationTaster, <http://mutationtaster.org/>).

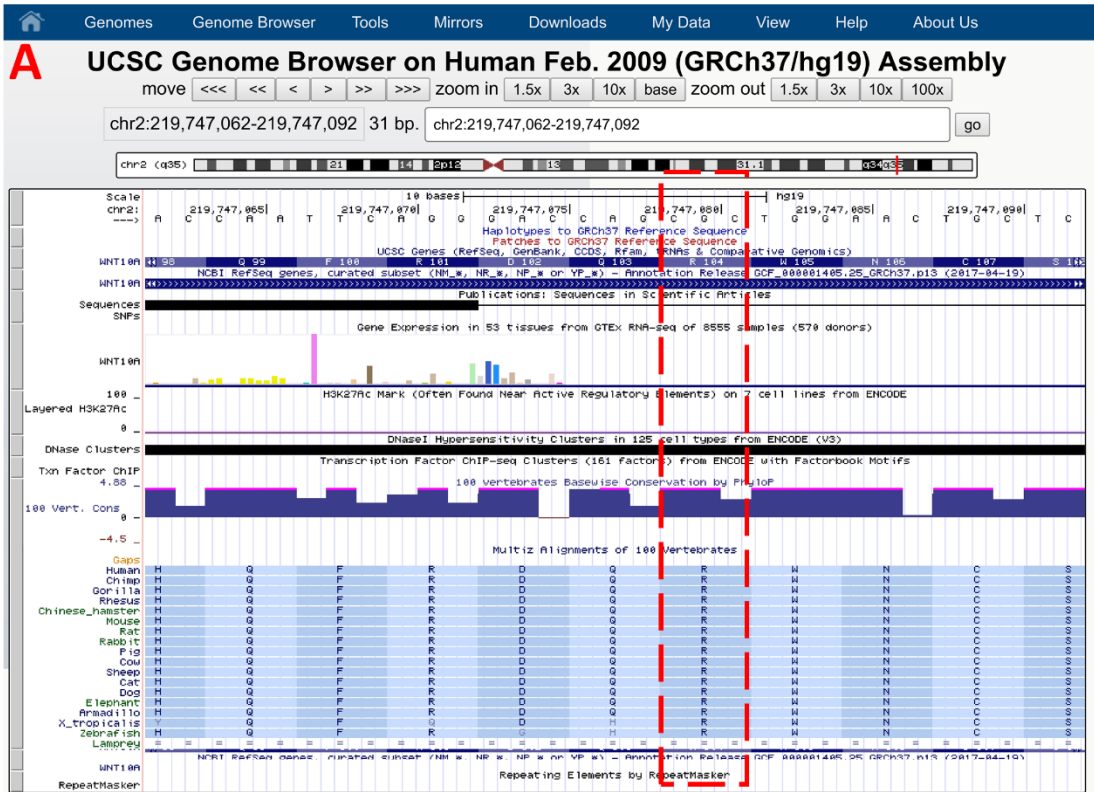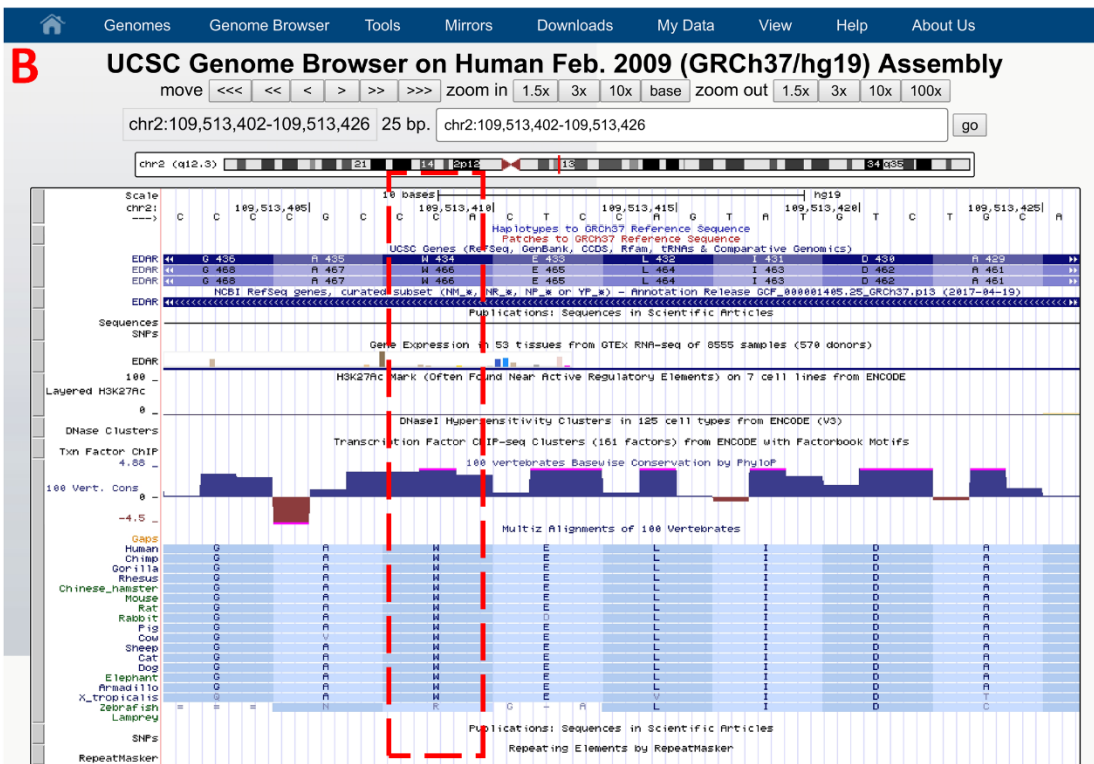

**Figure S5:** Evolutionary conservation of amino acids Arg104 (A) of WNT10A (family A) and Trp434 (B) of EDAR (family C). The images are taken from UCSC Genome Browser.

**Table S1. Protein-Protein Docked complexes of *WNT10A/Fz8-CRD* and *EDAR/EDARADD*.**

| <i>WNT10A/Fz8-CRD</i> |         |                |                | <i>EDAR/EDARADD</i> docked complex |         |                |                |
|-----------------------|---------|----------------|----------------|------------------------------------|---------|----------------|----------------|
| Cluster               | Members | Representative | Weighted Score | Cluster                            | Members | Representative | Weighted Score |
| <b>0</b>              | 90      | Center         | -1609.9        | <b>0</b>                           | 137     | Center         | -737.6         |
|                       |         | Lowest Energy  | -1632.9        |                                    |         | Lowest Energy  | -682.4         |
| <b>1</b>              | 80      | Center         | -1569.4        | <b>1</b>                           | 98      | Center         | -658.7         |
|                       |         | Lowest Energy  | -1668.8        |                                    |         | Lowest Energy  | -639.4         |
| <b>2</b>              | 53      | Center         | -1491.1        | <b>2</b>                           | 64      | Center         | -571.1         |
|                       |         | Lowest Energy  | -1544.6        |                                    |         | Lowest Energy  | -634.5         |
| <b>3</b>              | 51      | Center         | -1436          | <b>3</b>                           | 59      | Center         | -559.7         |
|                       |         | Lowest Energy  | -1579.1        |                                    |         | Lowest Energy  | -537.8         |
| <b>4</b>              | 50      | Center         | -1421.7        | <b>4</b>                           | 55      | Center         | -575.2         |
|                       |         | Lowest Energy  | -1666.5        |                                    |         | Lowest Energy  | -667.5         |
| <b>5</b>              | 48      | Center         | -1549.9        | <b>5</b>                           | 52      | Center         | -557.8         |
|                       |         | Lowest Energy  | -1598.4        |                                    |         | Lowest Energy  | -616.1         |
| <b>6</b>              | 44      | Center         | -1443.1        | <b>6</b>                           | 50      | Center         | -589.1         |
|                       |         | Lowest Energy  | -1604.2        |                                    |         | Lowest Energy  | -666.8         |
| <b>7</b>              | 35      | Center         | -1484.3        | <b>7</b>                           | 48      | Center         | -624           |
|                       |         | Lowest Energy  | -1574.5        |                                    |         | Lowest Energy  | -681.2         |
| <b>8</b>              | 35      | Center         | -1407          | <b>8</b>                           | 46      | Center         | -602.2         |
|                       |         | Lowest Energy  | -1509.3        |                                    |         | Lowest Energy  | -662           |
| <b>9</b>              | 32      | Center         | -1432.7        | <b>9</b>                           | 38      | Center         | -592.6         |
|                       |         | Lowest Energy  | -1644.8        |                                    |         | Lowest Energy  | -609           |
| <b>10</b>             | 32      | Center         | -1558          | <b>10</b>                          | 36      | Center         | -548.9         |
|                       |         | Lowest Energy  | -1680.5        |                                    |         | Lowest Energy  | -708.3         |
| <b>11</b>             | 25      | Center         | -1447.4        | <b>11</b>                          | 36      | Center         | -557.5         |
|                       |         | Lowest Energy  | -1521.5        |                                    |         | Lowest Energy  | -604.1         |
| <b>12</b>             | 22      | Center         | -1411.6        | <b>12</b>                          | 36      | Center         | -548.8         |
|                       |         | Lowest Energy  | -1504.7        |                                    |         | Lowest Energy  | -592           |
| <b>13</b>             | 21      | Center         | -1416.7        | <b>13</b>                          | 26      | Center         | -552.9         |
|                       |         | Lowest Energy  | -1497.8        |                                    |         | Lowest Energy  | -598.5         |
| <b>14</b>             | 19      | Center         | -1554.2        | <b>14</b>                          | 23      | Center         | -589.9         |
|                       |         | Lowest Energy  | -1614.4        |                                    |         | Lowest Energy  | -628.3         |
| <b>15</b>             | 18      | Center         | -1426.1        | <b>15</b>                          | 20      | Center         | -596.9         |
|                       |         | Lowest Energy  | -1440.2        |                                    |         | Lowest Energy  | -596.9         |
| <b>16</b>             | 17      | Center         | -1403.1        | <b>16</b>                          | 18      | Center         | -606.8         |
|                       |         | Lowest Energy  | -1574.8        |                                    |         | Lowest Energy  | -606.8         |
| <b>17</b>             | 16      | Center         | -1396.6        | <b>17</b>                          | 17      | Center         | -567.5         |
|                       |         | Lowest Energy  | -1508.1        |                                    |         | Lowest Energy  | -625           |
| <b>18</b>             | 16      | Center         | -1479.6        | <b>18</b>                          | 17      | Center         | -560.6         |
|                       |         | Lowest Energy  | -1490.2        |                                    |         | Lowest Energy  | -579.8         |
| <b>19</b>             | 16      | Center         | -1563.8        | <b>19</b>                          | 16      | Center         | -589.7         |
|                       |         | Lowest Energy  | -1563.8        |                                    |         | Lowest Energy  | -589.7         |
| <b>20</b>             | 15      | Center         | -1395.2        | <b>20</b>                          | 16      | Center         | -590.4         |
|                       |         | Lowest Energy  | -1500.7        |                                    |         | Lowest Energy  | -590.4         |
| <b>21</b>             | 15      | Center         | -1416.4        | <b>21</b>                          | 15      | Center         | -642.2         |
|                       |         | Lowest Energy  | -1527.5        |                                    |         | Lowest Energy  | -642.2         |
| <b>22</b>             | 14      | Center         | -1398.8        | <b>22</b>                          | 14      | Center         | -571.7         |
|                       |         | Lowest Energy  | -1511          |                                    |         | Lowest Energy  | -571.7         |
| <b>23</b>             | 14      | Center         | -1411.1        | <b>23</b>                          | 13      | Center         | -574.2         |
|                       |         | Lowest Energy  | -1498          |                                    |         | Lowest Energy  | -574.2         |
| <b>24</b>             | 13      | Center         | -1394.3        | <b>24</b>                          | 10      | Center         | -576.9         |
|                       |         | Lowest Energy  | -1466.8        |                                    |         | Lowest Energy  | -594           |
| <b>25</b>             | 13      | Center         | -1425.8        | <b>25</b>                          | 10      | Center         | -573.7         |
|                       |         | Lowest Energy  | -1441.3        |                                    |         | Lowest Energy  | -607           |
| <b>26</b>             | 13      | Center         | -1473.6        | <b>26</b>                          | 9       | Center         | -547.9         |
|                       |         | Lowest Energy  | -1474.2        |                                    |         | Lowest Energy  | -636           |
| <b>27</b>             | 12      | Center         | -1401.8        | <b>27</b>                          | 5       | Center         | -571.6         |
|                       |         | Lowest Energy  | -1451.4        |                                    |         | Lowest Energy  | -573.2         |
| <b>28</b>             | 12      | Center         | -1425.7        | <b>28</b>                          | 4       | Center         | -553.5         |
|                       |         | Lowest Energy  | -1497.2        |                                    |         | Lowest Energy  | -565.3         |

|           |    |               |         |           |   |               |        |
|-----------|----|---------------|---------|-----------|---|---------------|--------|
| <b>29</b> | 12 | Center        | -1406.2 | <b>29</b> | 2 | Center        | -550.7 |
|           |    | Lowest Energy | -1489.2 |           |   | Lowest Energy | -561.3 |

**Table S2.** Primers for variants in *WNT10A* and *EDA*.

|   | <b>Variant</b>              | <b>Primer</b> | <b>Temperature</b> | <b>Sequence</b>       |
|---|-----------------------------|---------------|--------------------|-----------------------|
| 1 | WNT10A_c.311G>A_p.Arg104His | F             | 61.8 C             | ggatgtgcataggaactgtgg |
|   |                             | R             | 62.6 C             | aggcagtgggttagaaatgac |
| 2 | EDA_c.1076T>C_p.Met359Thr   | F             | 63.2 C             | gtggtggatgagaagccctc  |
|   |                             | R             | 65.3 C             | tccggctgcaaccaatac    |
